# Supplementary material for: Discriminating between sleep and exercise-induced fatigue using computer vision and behavioral genetics
Source: bioRxiv or medRxiv preprint supplement (doi:10.1101/2020.02.06.937359), 2020-02-07

**A**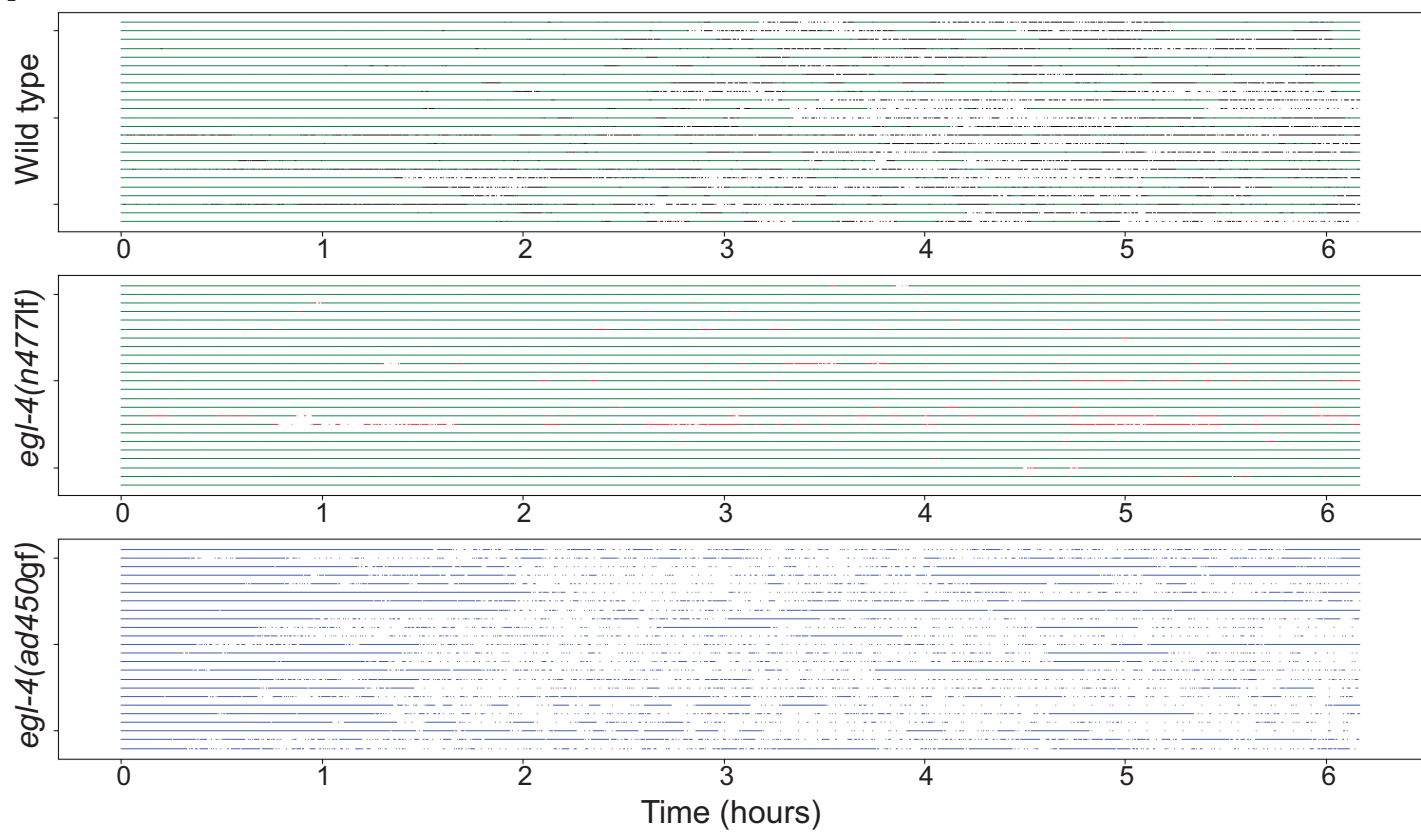**B**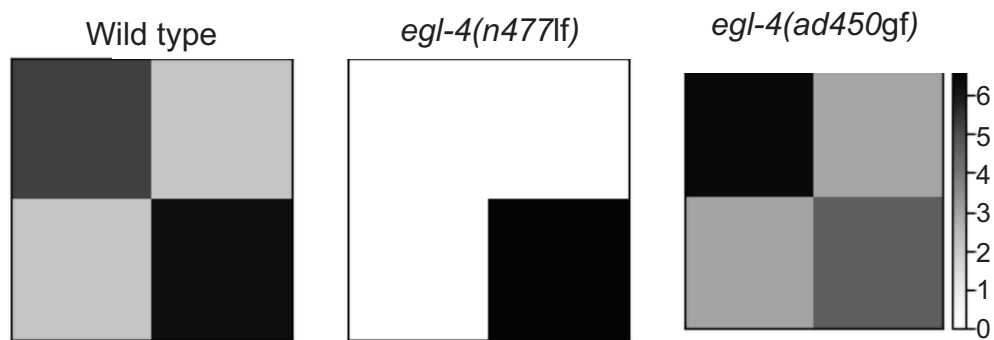**C**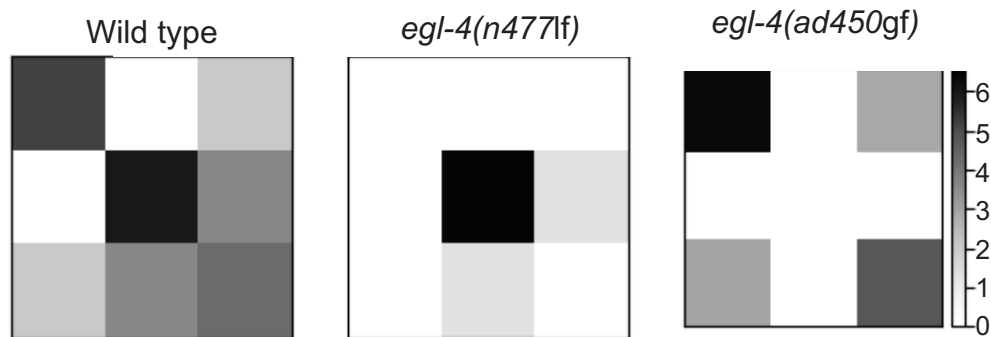

Supplement: Supplementary file [file media-3.pdf]
